# Supplementary material for: 4-Phenylbutyrate Attenuates the ER Stress Response and Cyclic AMP Accumulation in DYT1 Dystonia Cell Models
Source: PubMed Central journal article supplement (PMC4224384; doi:10.1371/journal.pone.0110086), 2014-11-07
Supplement: pone.0110086.s001.pdf [file pone.0110086.s001.pdf]

## Supporting Information

### Supplementary Figure S1.

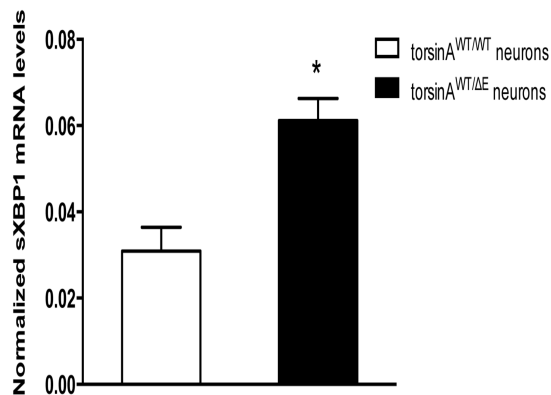

### Supplementary Figure 1.

#### Neurons expressing torsinAΔE has higher ER stress compared to control neurons.

Total mRNA was prepared from a mixed neuronal culture of dissociated primary cortical and striatal at E15 from controls littermates torsinA<sup>wt/wt</sup>, and heterozygotes torsinA<sup>wt/ΔE</sup> knock-in dystonia mice (\* $P < 0.001$ ; Student t-test, 2 independent experiments, with average of 2-3 embryos per genotype). Relative expression of sliced sXBP1 mRNA levels was measured by quantitative PCR. Results might indicate that the presence of torsinAΔE increases ER stress in neurons.
