# Supplementary material for: 4-Phenylbutyrate Attenuates the ER Stress Response and Cyclic AMP Accumulation in DYT1 Dystonia Cell Models
Source: PubMed Central journal article supplement (PMC4224384; doi:10.1371/journal.pone.0110086), 2014-11-07
Supplement: pone.0110086.s002.pdf [file pone.0110086.s002.pdf]

### Supplementary Table S1.

Human fibroblast cells used in this study.

| Cell Line   | Genotype | Source      | Gender | Age (YR) | Initial passage | Passage used |
|-------------|----------|-------------|--------|----------|-----------------|--------------|
| GM00023     | Healthy  | Coriell     | Female | 31       | 8               | 10-20        |
| GM00024     | Healthy  | Coriell     | Male   | 31       | 8               | 10-20        |
| GM01651     | Healthy  | Coriell     | Female | 13       | 12              | 14-20        |
| GM02912     | Healthy  | Coriell     | Male   | 29       | 9               | 11-20        |
| HF6         | Healthy  | Breakefield | nd     | 22       | 7               | 9-20         |
| HF19        | Healthy  | Breakefield | Female | 27       | 2               | 8-20         |
| GM02306     | DYT1     | Coriell     | Male   | 13       | 3               | 8-20         |
| GM02551     | DYT1     | Coriell     | Female | 31       | 3               | 8-20         |
| GM03208     | DYT1     | Coriell     | Male   | 29       | 2               | 8-20         |
| GM03211     | DYT1     | Coriell     | Male   | 39       | 2               | 8-20         |
| FFF13111983 | DYT1     | Filocamo    | Male   | nd       | 12              | 14-20        |
| HF48        | DYT1     | Breakefield | Female | 32       | 4               | 8-20         |

Abbreviation: nt, not determined; HF, human fibroblast; Healthy, apparently healthy controls; DYT1, primary human fibroblast cells from DYT1 dystonia patients; Breakefield, gift from Dr. Xandra Breakefield DYT1 fibroblast collection (Massachusetts General Hospital & Harvard Medical School, IRB no.: 2007P001632); Filocamo, gift from Dr. Mirella Filocamo (Biobank from Patients affected by Genetic Diseases, L'Istituto Giannina Gaslini, Genoa, Italy), member of the Telethon Network of Genetic Biobanks (project no.: GTB12001); and Coriell, purchased from Coriell Cell Repository (Camden, NJ, USA) (<http://locus.umdj.edu/cnr/>).
